# Supplementary material for: ARC6-mediated Z ring-like structure formation of prokaryote-descended chloroplast FtsZ in Escherichia coli
Source: PubMed Central journal article supplement (PMC5471200; doi:10.1038/s41598-017-03698-6), 2017-06-14
Supplement: 41598_2017_3698_MOESM1_ESM.pdf [file 41598_2017_3698_MOESM1_ESM.pdf]

## Supplementary Information

### **ARC6-mediated Z ring-like structure formation of prokaryote-descended chloroplast FtsZ in *Escherichia coli***

Hiroki Irieda<sup>†</sup> and Daisuke Shiomi<sup>\*</sup>

Department of Life Science, College of Science, Rikkyo University, Tokyo 171-8501, Japan.

<sup>†</sup>Present address: Academic Assembly, Institute of Agriculture, Shinshu University, 8304 Minamiminowa, Kami-Ina, Nagano 399-4598, Japan.

<sup>\*</sup>Corresponding author: Daisuke Shiomi

Tel: +81-3-3985-2401

Fax: +81-3-3985-2401

E-mail: [dshiomi@rikkyo.ac.jp](mailto:dshiomi@rikkyo.ac.jp)

Running title: Membrane tethering of chloroplast Z ring via ARC6

**Table S1. Plasmids used in this study.**

| <b>Plasmids</b> | <b>Description</b>                       | <b>Source/reference</b>           |
|-----------------|------------------------------------------|-----------------------------------|
| pDSW204         |                                          | Weiss <i>et al.</i> , 1999        |
| pRU194          | <i>sfGFP</i>                             | This study                        |
| pRU200          | <i>sfGFP-2MTS</i>                        | This study                        |
| pRU329          | <i>AtFtsZ2-1</i>                         | This study                        |
| pRU613          | <i>AtFtsZ2-1-2MTS</i>                    | This study                        |
| pRU310          | <i>AtFtsZ2-1-sfGFP</i>                   | This study                        |
| pRU296          | <i>AtFtsZ2-1-sfGFP-2MTS</i>              | This study                        |
| pRU712          | <i>AtFtsZ2-1 ΔN</i>                      | This study                        |
| pRU722          | <i>AtFtsZ2-1 ΔN-2MTS</i>                 | This study                        |
| pRU711          | <i>AtFtsZ2-1 ΔN-sfGFP</i>                | This study                        |
| pRU731          | <i>ftsZ</i>                              | This study                        |
| pRU874          | <i>sfGFP-AtFtsZ2-1</i>                   | This study                        |
| pRU888          | <i>sfGFP-AtFtsZ2-1 ΔC18</i>              | This study                        |
| pRU876          | <i>sfGFP-AtFtsZ2-1-2MTS</i>              | This study                        |
| pRU878          | <i>sfGFP-ftsZ</i>                        | This study                        |
| pRU972          | <i>sfGFP-AtFtsZ1</i>                     | This study                        |
| pRU957          | <i>ARC6-mCherry &amp;sfGFP-AtFtsZ2-1</i> | This study                        |
| pKG116          |                                          | Buron-Barral <i>et al.</i> , 2006 |
| pRU394          | <i>mCherry</i>                           | This study                        |
| pRU325          | <i>ARC6</i>                              | This study                        |
| pRU889          | <i>ARC6-mCherry</i>                      | This study                        |
| pRU886          | <i>ARC3 ΔC143-mCherry</i>                | This study                        |
| pRU930          | <i>mCherry-AtFtsZ1</i>                   | This study                        |

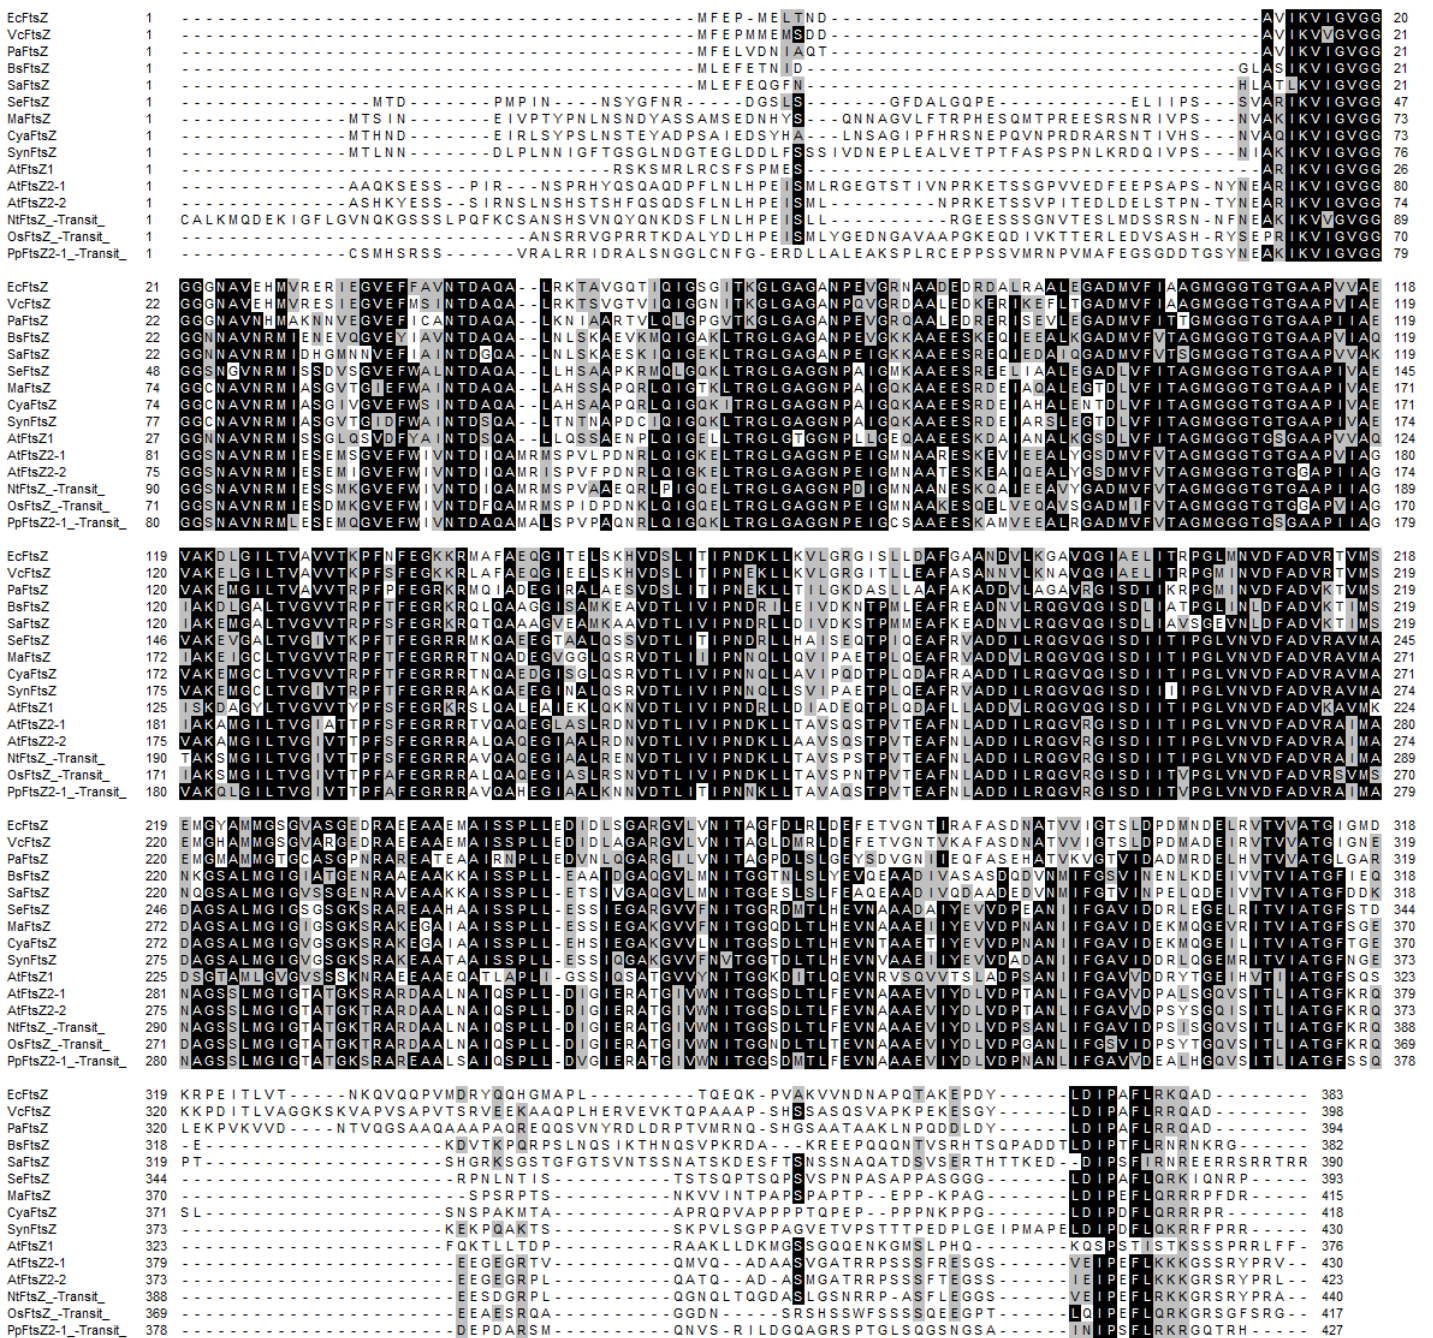

**Figure S1. Amino acid sequence alignment of FtsZ homologues in bacteria and plants.** FtsZ homologues of *Escherichia coli* (Ec), *Vibrio cholerae* (Vc), *Pseudomonas aeruginosa* PAO1 (Pa), *Bacillus subtilis* (Bs), *Staphylococcus aureus* (Sa), *Synechococcus elongatus* PCC 7942 (Se), *Microcystis aeruginosa* PCC 7806 (Ma), *Cyanotheca* sp. PCC 7822 (Cya), *Synechocystis* sp. PCC 6803 (Syn), *Arabidopsis thaliana* (At), *Nicotiana tabacum* (Nt), *Oryza sativa* Japonica Group (Os) and *Physcomitrella patens* (Pp) were used for the alignment. ClustalW multiple alignments were visualized using BioEdit ver. 7.2.5 and colored by percentage identity (black) and similarity (gray).

A

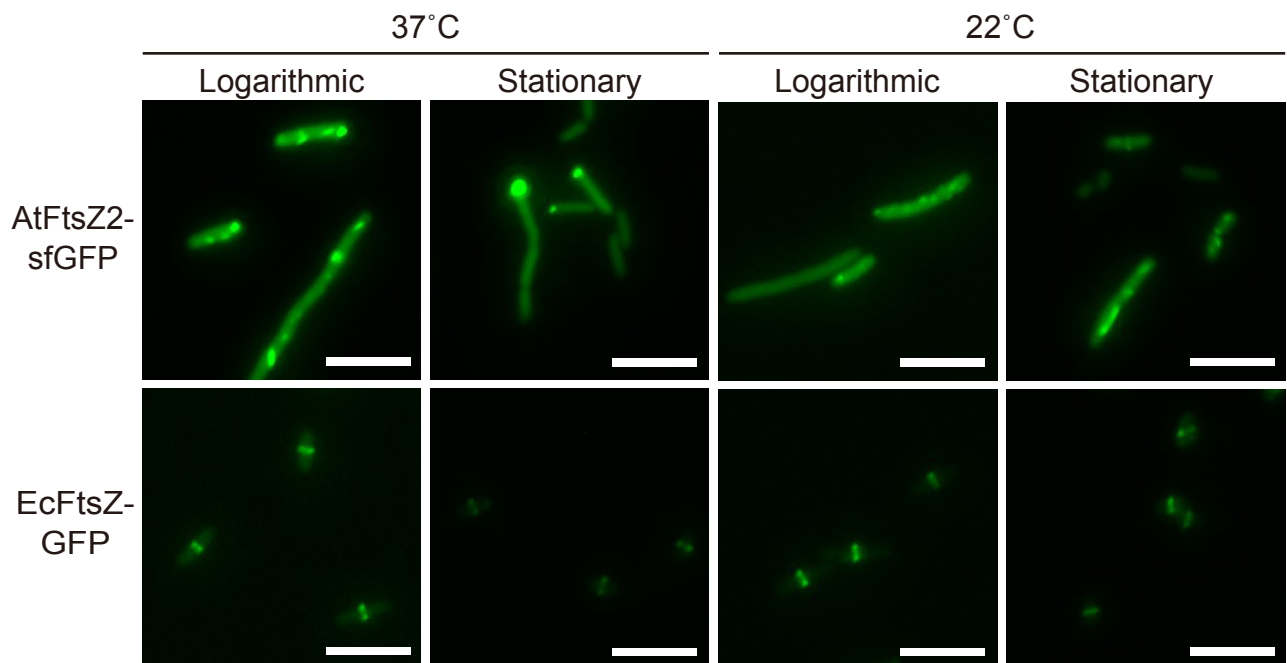

B

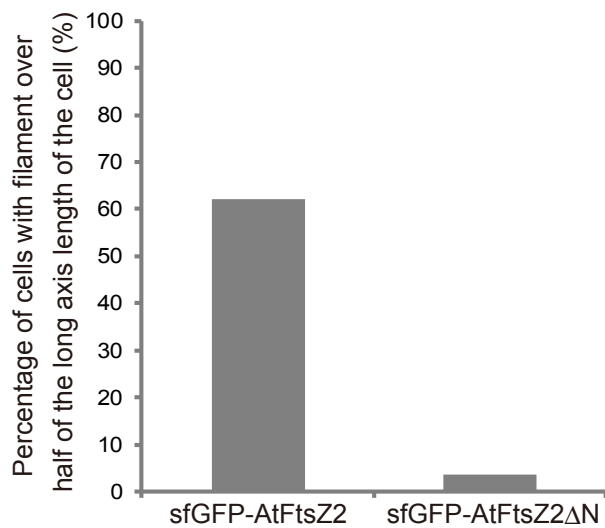

**Figure S2. Localization pattern of C-terminally fluorescent protein-fused AtFtsZ2 and quantification of AtFtsZ2 filaments with or without its N-terminus.**

(A) Fluorescent images of AtFtsZ2-sfGFP and EcFtsZ-GFP at various conditions. Bars=5μm.

(B) Quantification of the effect of AtFtsZ2 N-terminal region on filamentation. The graph shows the percentage of cells containing sfGFP-AtFtsZ2 filaments that extended over half the cell length along the long axis. At least 100 bacterial cells were investigated for the quantification.

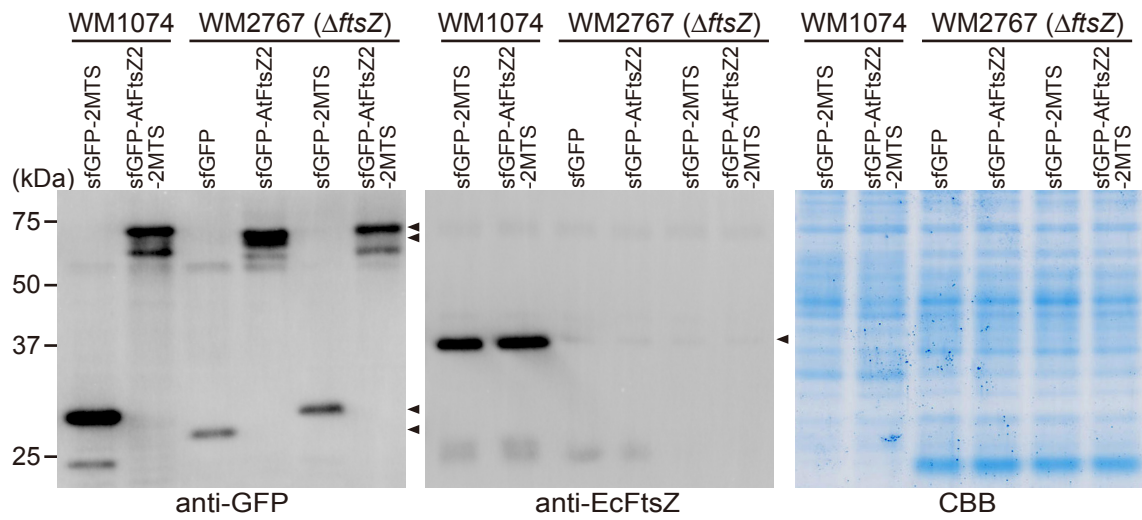

**Figure S3. Immunoblot analysis of FtsZ homologues at various conditions.**

sfGFP-fused proteins and endogenous EcFtsZ were detected by anti-GFP and anti-EcFtsZ antibodies, respectively. Arrowheads indicate full-length band of each protein. Coomassie staining was performed as a loading control.

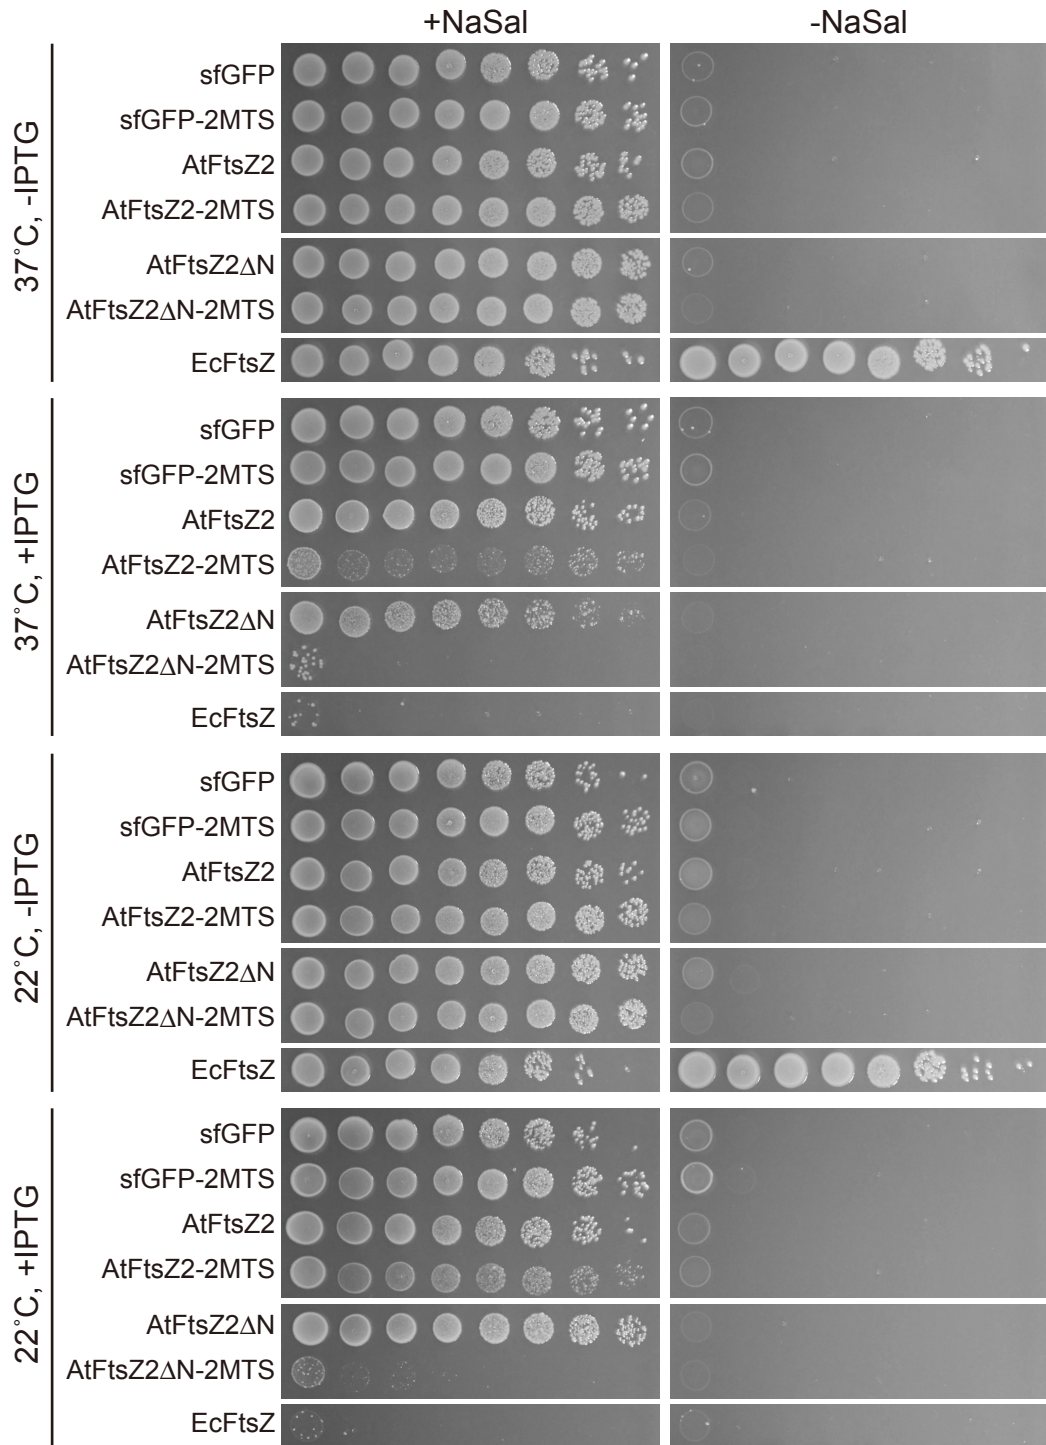

**Figure S4. Complementation assay of various AtFtsZ2 constructs in FtsZ-depleted strain WM2767.**

Depletion of endogenous EcFtsZ was achieved by removal of NaSal in bacterial culture. The expression of AtFtsZ2 constructs and EcFtsZ is induced by IPTG. The plates were incubated for 22 h (37°C) and 77 h (22°C), respectively.

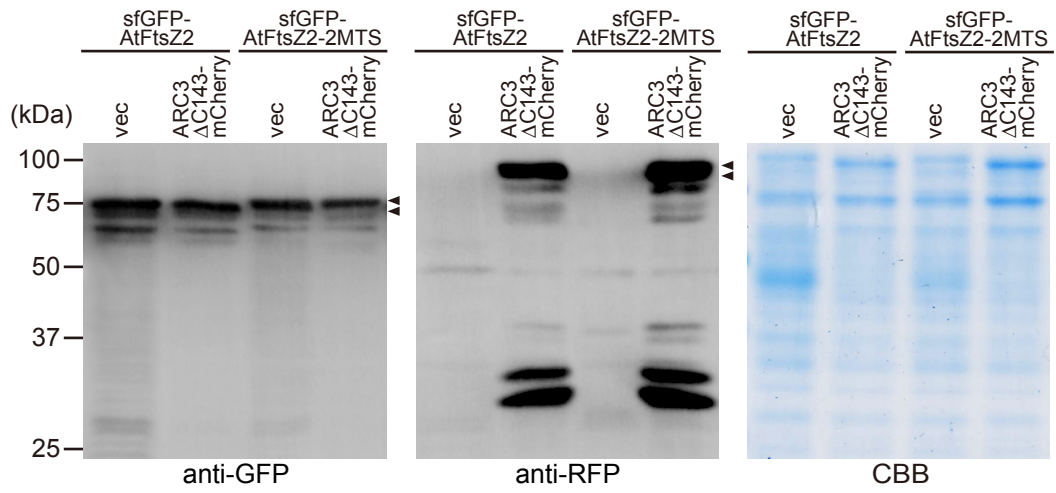

**Figure S5. Immunoblot analysis of FtsZ homologues and/or ARC3.**

sfGFP-fused AtFtsZ2 and mCherry-fused ARC3 expressed in WM1074 cells were detected by anti-GFP and anti-RFP antibodies, respectively. Arrowheads indicate full-length band of each protein. Coomassie staining was performed as a loading control.

A

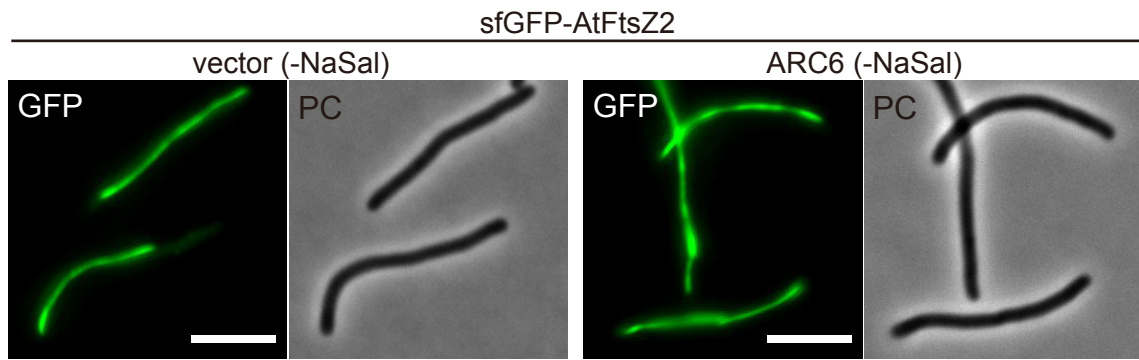

B

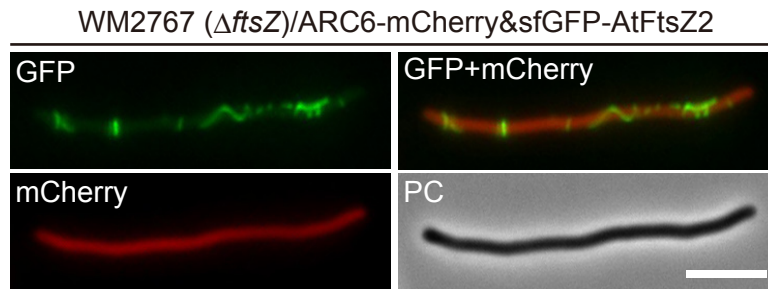

C

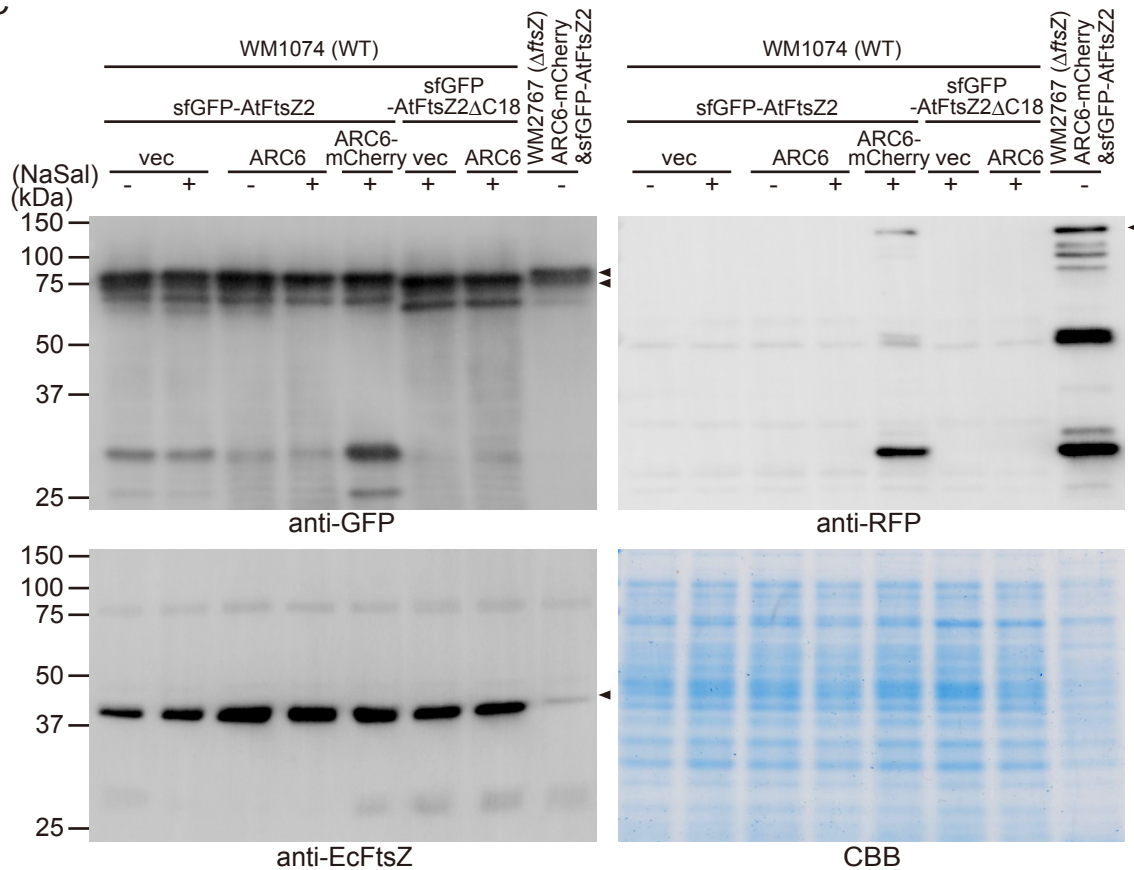

**Figure S6. The effects of ARC6 on filament morphology of sfGFP-AtFtsZ2 and immunoblots of FtsZ homologues and/or ARC6.**

(A) Fluorescent image of sfGFP-AtFtsZ2 in WM1074 strain in the absence of NaSal. Bars=5 $\mu$ m.

(B) Concurrent observation of sfGFP-AtFtsZ2 Z ring-like structures and ARC6-mCherry in WM2767 strain. Bar=5 $\mu$ m.

(C) sfGFP- and mCherry-fused proteins and endogenous EcFtsZ were detected by anti-GFP, anti-RFP and anti-EcFtsZ antibodies, respectively. Arrowheads indicate full-length band of each protein. Coomassie staining was performed as a loading control.



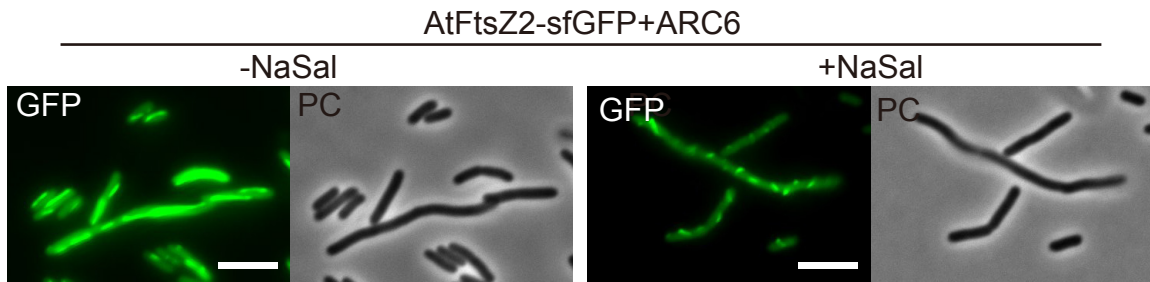

**Figure S7. The effects of ARC6 on localization pattern of C-terminally fluorescent protein-fused AtFtsZ2.** Filament morphology of AtFtsZ2-sfGFP with or without NaSal (an inducer for expression of ARC6) in WM1074 strain at 22°C. Bars=5 $\mu$ m.

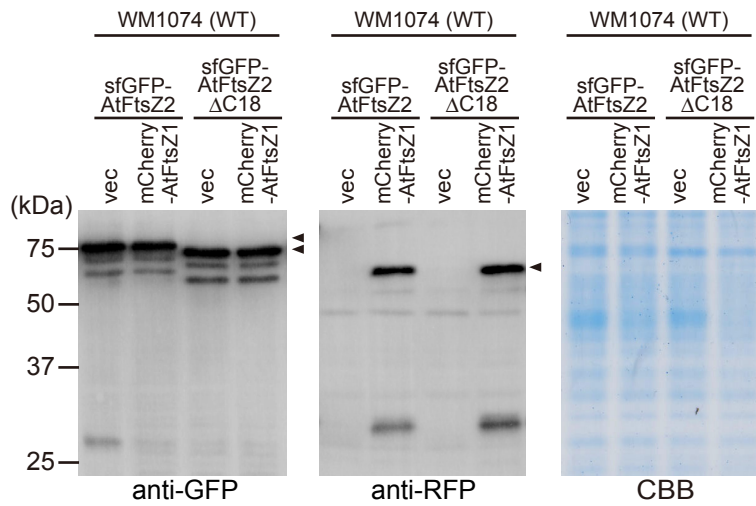

**Figure S8. Immunoblots of AtFtsZ1 and AtFtsZ2.**

sfGFP-AtFtsZ2 and mCherry-AtFtsZ1 were detected by anti-GFP and anti-RFP antibodies, respectively. Arrowheads indicate full-length band of each protein. Coomassie staining was performed as a loading control.
